# Supplementary material
Source: publisher site journal article supplement (https://www.dovepress.com/article/157104)

## *Supporting Information*

# **Symmetric Dimeric Adamantanes for Exploring the Structure of The Two Viroporins: Influenza Virus M2 and HCV p7**

Yasmine M. Mandour <sup>a\*</sup>, Ulrike Breitinge<sup>r</sup> <sup>b</sup>, Chunlong Ma <sup>c</sup>, Jun Wang <sup>c</sup>, Frank Boeckler <sup>d</sup>,  
Hans-Georg Breitinge<sup>r</sup> <sup>b</sup>, Darius Zlotos <sup>a</sup>

<sup>a</sup> German University in Cairo, Department of Pharmaceutical Chemistry, New Cairo City, 11835 Cairo, Egypt.

<sup>b</sup> German University in Cairo, Department of Biochemistry, New Cairo City, 11835 Cairo, Egypt.

<sup>c</sup> University of Arizona, Department of Pharmacology and Toxicology, Tucson, AZ 85721, USA.

<sup>d</sup> Eberhard Karls University Tuebingen, Department of Pharmaceutical and Medicinal Chemistry, Auf der Morgenstelle 8, 72076 Tuebingen, Germany

\* The German University in Cairo, Department of Pharmaceutical Chemistry, New Cairo City, 11835 Cairo, Egypt. Tel: +202-27590715; Fax: +202-27581041; E-mail: yasmine.magdy@guc.edu.eg

- Figure S1.**  $^1\text{H}$  ( $\text{CD}_3\text{OD}$ , 400 MHz), DEPT-135 and  $^{13}\text{C}$  NMR spectra of Octanedioic acid bis-adamantan-1-ylamide (**1c**)
- Figure S2.**  $^1\text{H}$  ( $\text{CD}_3\text{OD}$ , 400 MHz), DEPT-135 and  $^{13}\text{C}$  NMR spectra of  $\text{N,N}'$ - Di-adamantan-1-yl-butane-1,4-diamine (**2a**)
- Figure S3.**  $^1\text{H}$  ( $\text{CDCl}_3$ , 400 MHz), DEPT-135 and  $^{13}\text{C}$  NMR spectra of  $\text{N,N}'$ - Di-adamantan-1-yl-hexane-1,4-diamine (**2b**)
- Figure S4.**  $^1\text{H}$  ( $\text{CD}_3\text{OD}$ , 400 MHz), DEPT-135 and  $^{13}\text{C}$  NMR spectra of  $\text{N,N}'$ - Di-adamantan-1-yl-octane-1,4-diamine (**2c**)
- Figure S5.**  $^1\text{H}$  ( $\text{CD}_3\text{OD}$ , 400 MHz), DEPT-135 and  $^{13}\text{C}$  NMR spectra of  $\text{N,N}'$ - Di-adamantan-1-yl-decane-1,4-diamine (**2d**)
- Figure S6.**  $^1\text{H}$  ( $\text{CD}_3\text{OD}$ , 400 MHz), DEPT-135 and  $^{13}\text{C}$  NMR spectra of  $\text{N,N}'$ - Di-adamantan-1-yl-dodecane-1,4-diamine (**2e**)
- Figure S7.**  $^1\text{H}$  ( $\text{CDCl}_3$ , 400 MHz), DEPT-135 and  $^{13}\text{C}$  NMR spectra of  $\text{N,N}'$ -Bis-(1-adamantan-1-yl-ethyl)-butane-1,4-diamine (**4a**)
- Figure S8.**  $^1\text{H}$  ( $\text{CDCl}_3$ , 400 MHz), DEPT-135 and  $^{13}\text{C}$  NMR spectra of  $\text{N,N}'$ -Bis-(1-adamantan-1-yl-ethyl)-hexane-1,6-diamine (**4b**)
- Figure S9.**  $^1\text{H}$  ( $\text{CDCl}_3$ , 400 MHz), DEPT-135 and  $^{13}\text{C}$  NMR spectra of  $\text{N,N}'$ -Bis-(1-adamantan-1-yl-ethyl)-octane-1,8-diamine (**4c**)
- Figure S10.**  $^1\text{H}$  ( $\text{CDCl}_3$ , 400 MHz), DEPT-135 and  $^{13}\text{C}$  NMR spectra of  $\text{N,N}'$ -Bis-(1-adamantan-1-yl-ethyl)-decane-1,10-diamine (**4d**)
- Figure S11.**  $^1\text{H}$  ( $\text{CDCl}_3$ , 400 MHz), DEPT-135 and  $^{13}\text{C}$  NMR spectra of  $\text{N,N}'$ -Bis-(1-adamantan-1-yl-ethyl)-dodecane-1,12-diamine (**4e**)
- Figure S12.**  $^1\text{H}$  ( $\text{CDCl}_3$ , 400 MHz), DEPT-135 and  $^{13}\text{C}$  NMR spectra of (1-Adamantan-1-yl-ethyl)-butyl-amine (**5a**)

**Figure S1.**  $^1\text{H}$  ( $\text{CD}_3\text{OD}$ , 400 MHz), DEPT-135 and  $^{13}\text{C}$  NMR spectra of Octanedioic acid bis-adamantan-1-ylamide (**1c**)

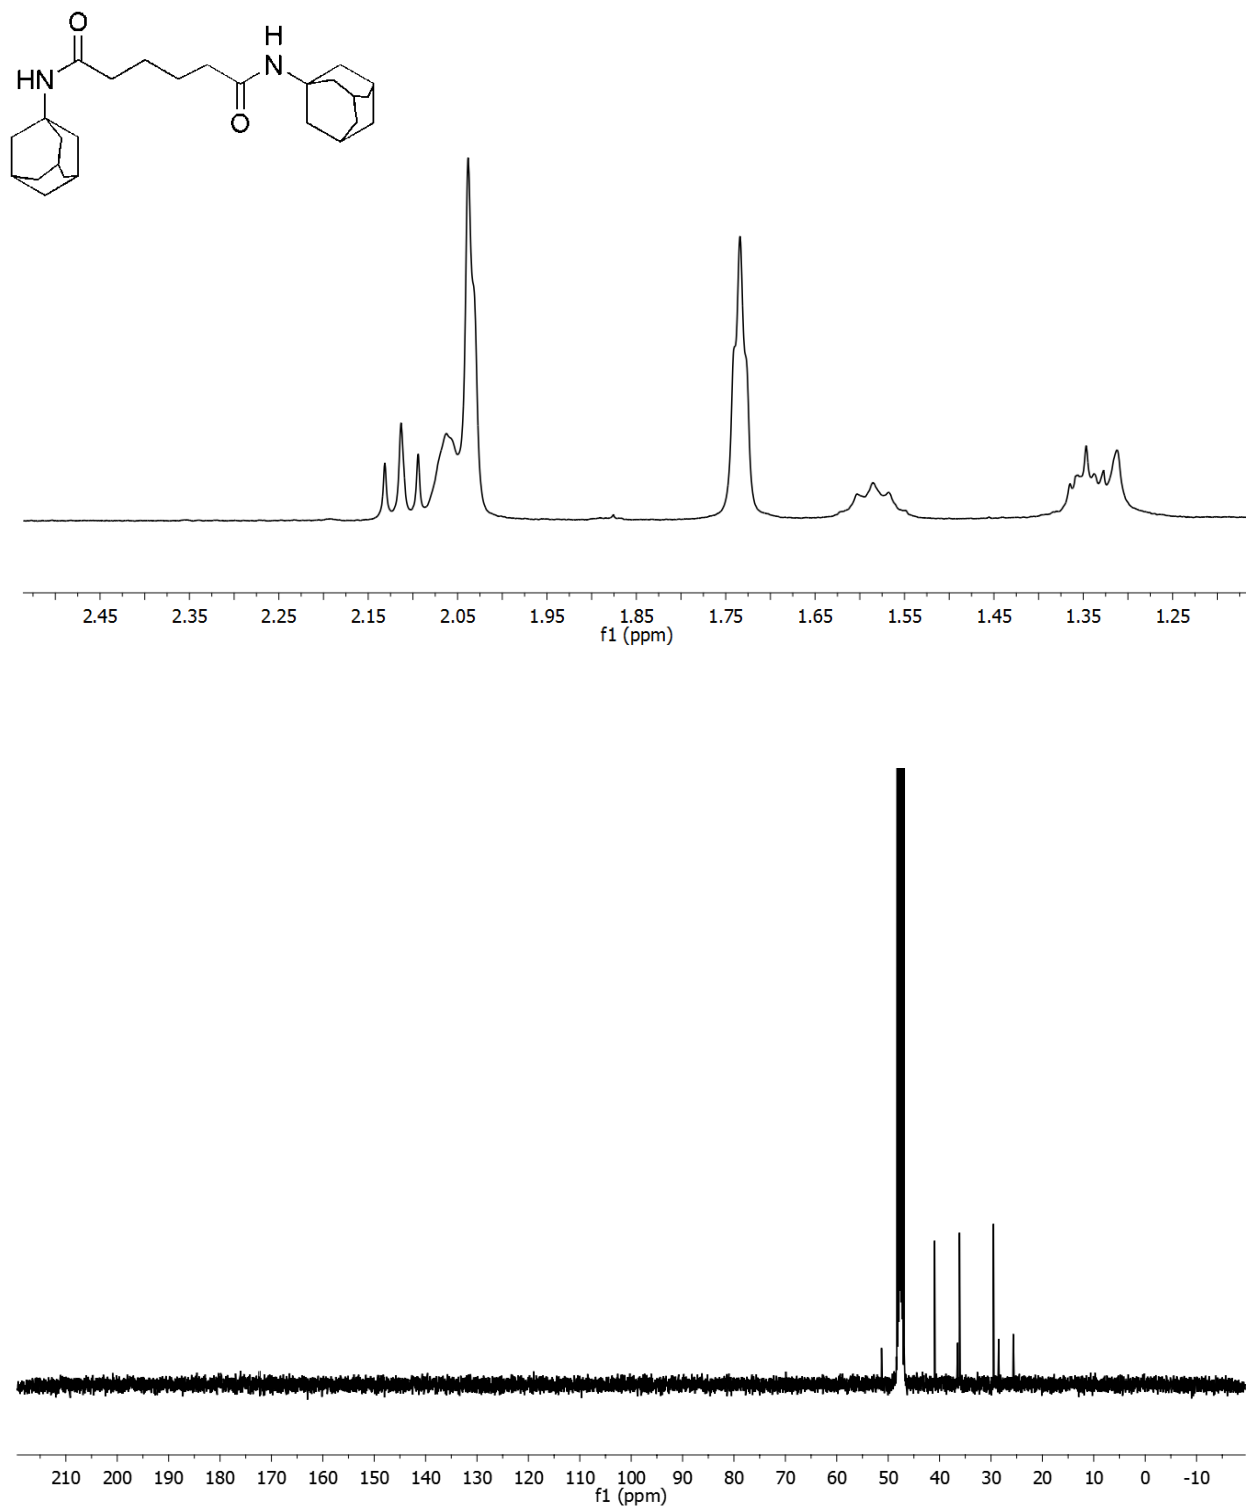

**Figure S2.**  $^1\text{H}$  ( $\text{CD}_3\text{OD}$ , 400 MHz), DEPT-135 and  $^{13}\text{C}$  NMR spectra of  $N,N'$ -Di-adamantan-1-yl-butane-1,4-diamine (**2a**)

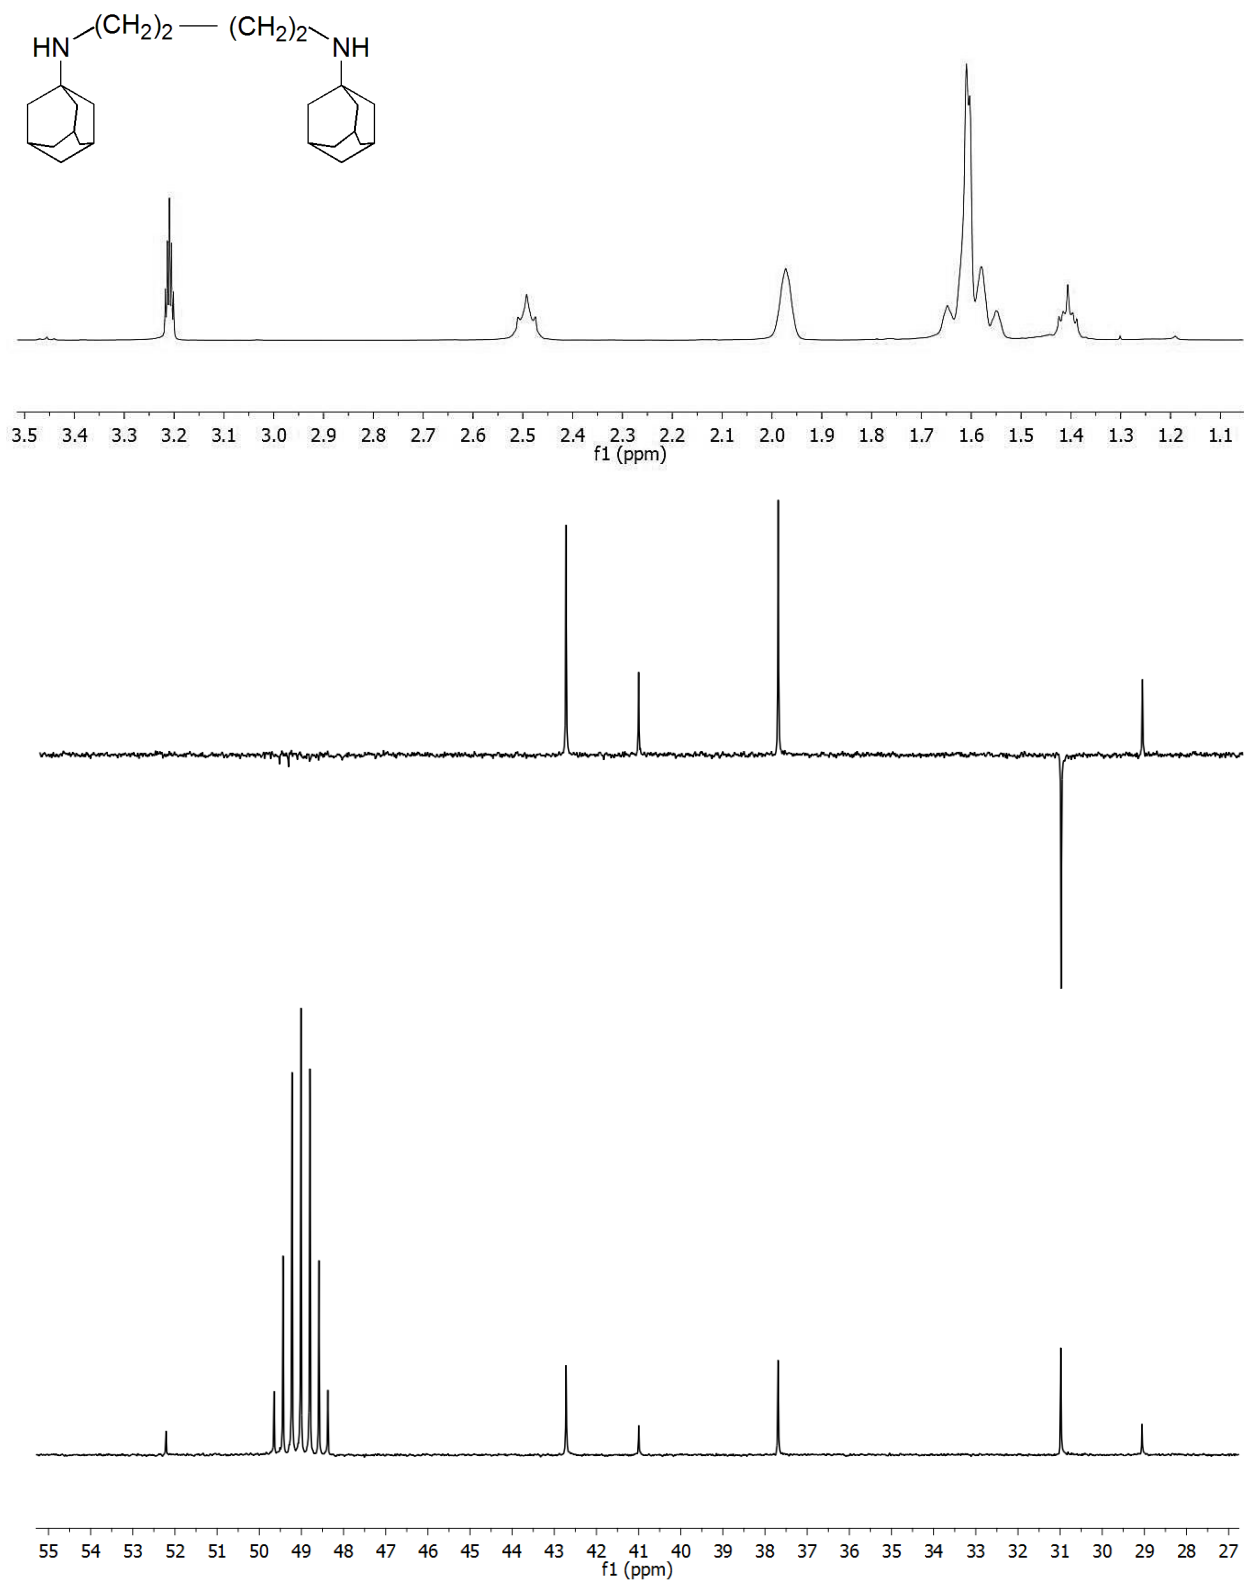

**Figure S3.**  $^1\text{H}$  ( $\text{CDCl}_3$ , 400 MHz), DEPT-135 and  $^{13}\text{C}$  NMR spectra of N,N'- Di-adamantan-1-yl-hexane-1,4-diamine (**2b**)

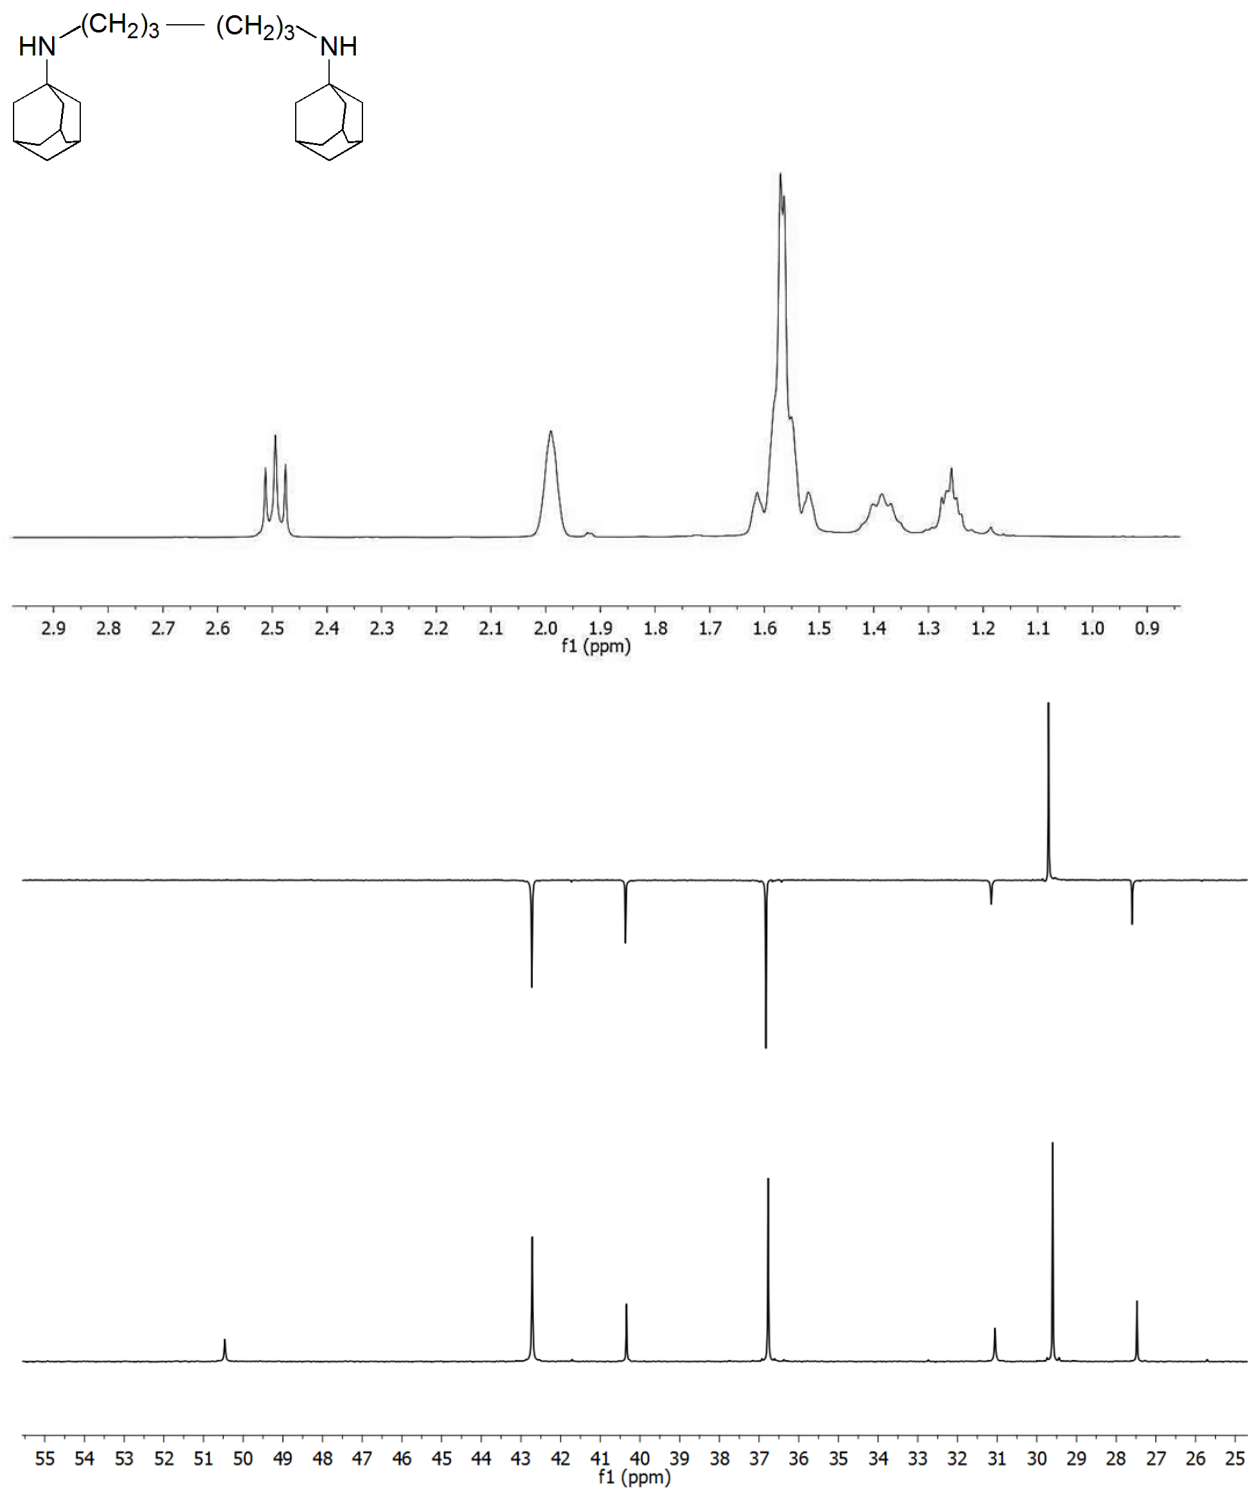

**Figure S4.**  $^1\text{H}$  ( $\text{CD}_3\text{OD}$ , 400 MHz), DEPT-135 and  $^{13}\text{C}$  NMR spectra of  $N,N'$ -Di-adamantan-1-yl-octane-1,4-diamine (**2c**)

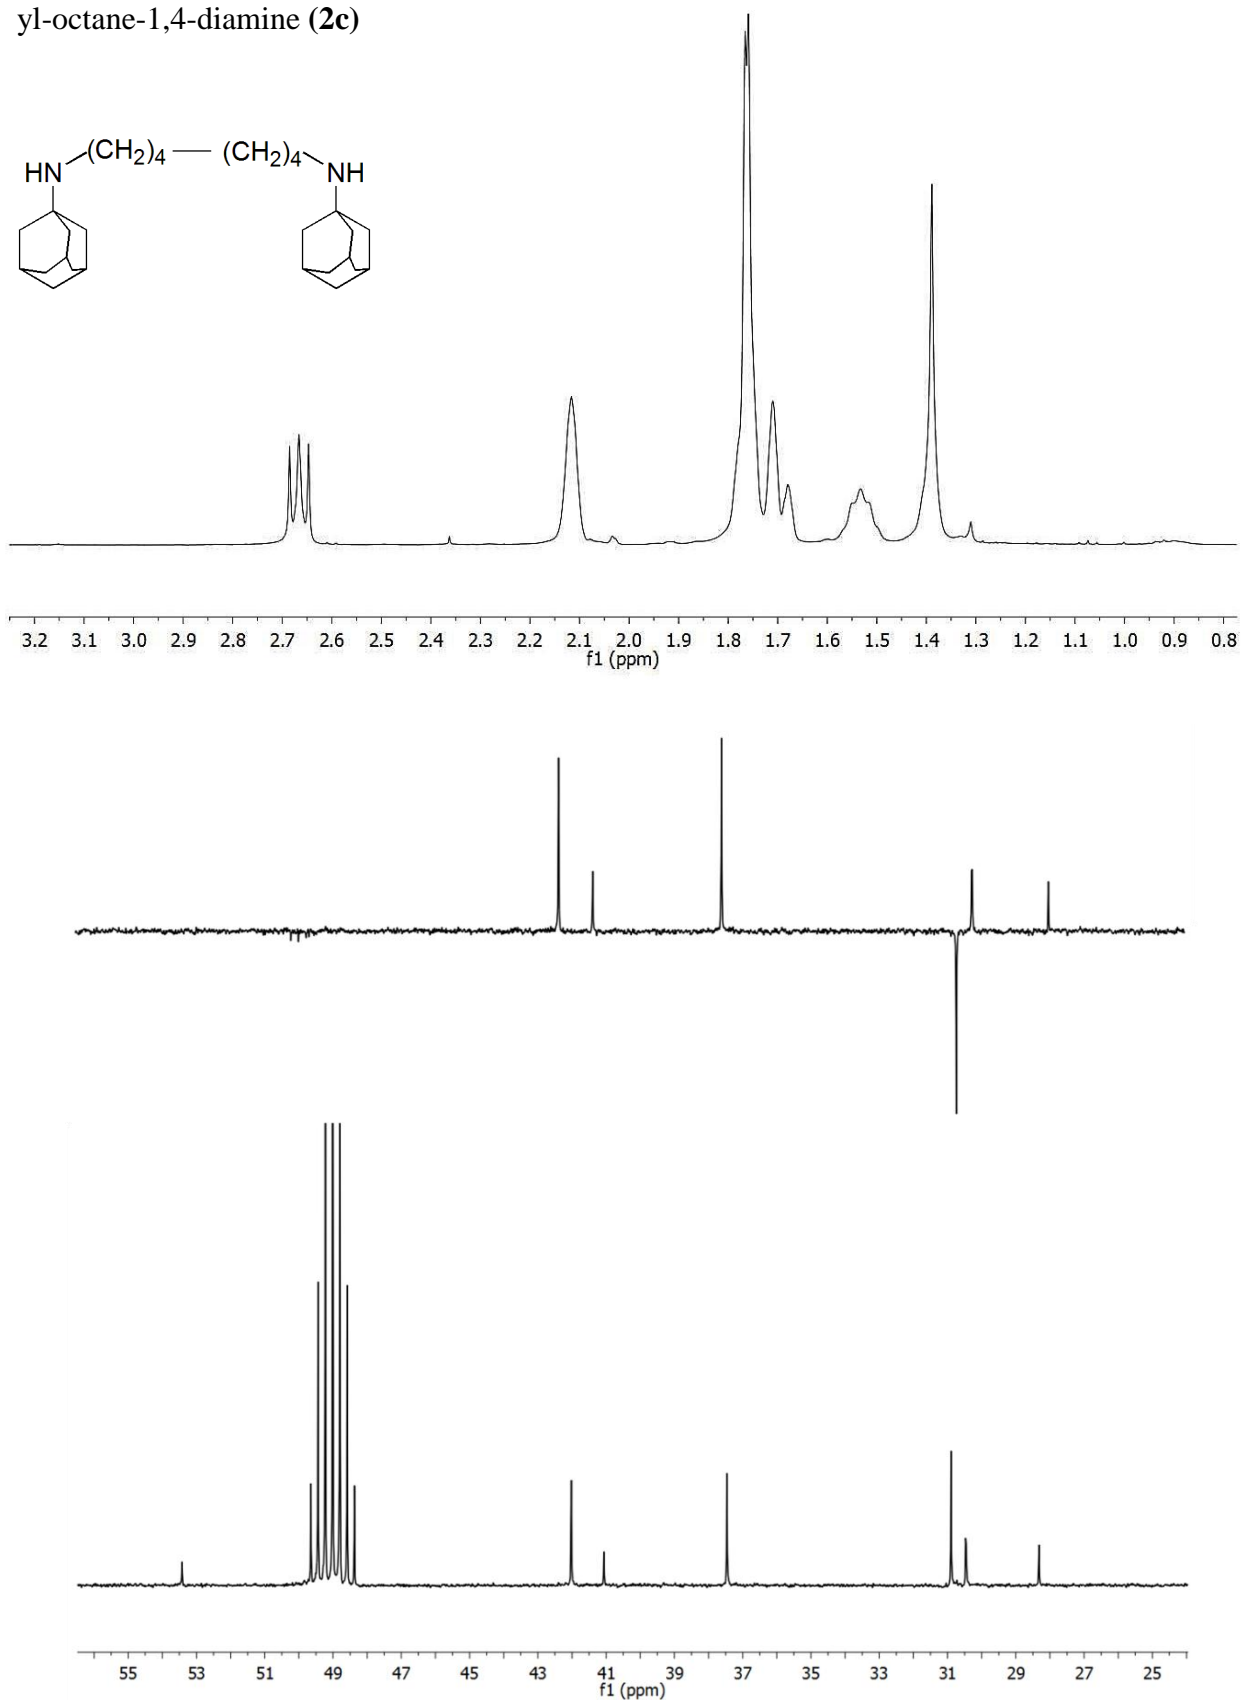

**Figure S5.**  $^1\text{H}$  ( $\text{CD}_3\text{OD}$ , 400 MHz), DEPT-135 and  $^{13}\text{C}$  NMR spectra of  $N,N'$ -Di-adamantan-1-yl-decane-1,4-diamine (**2d**)

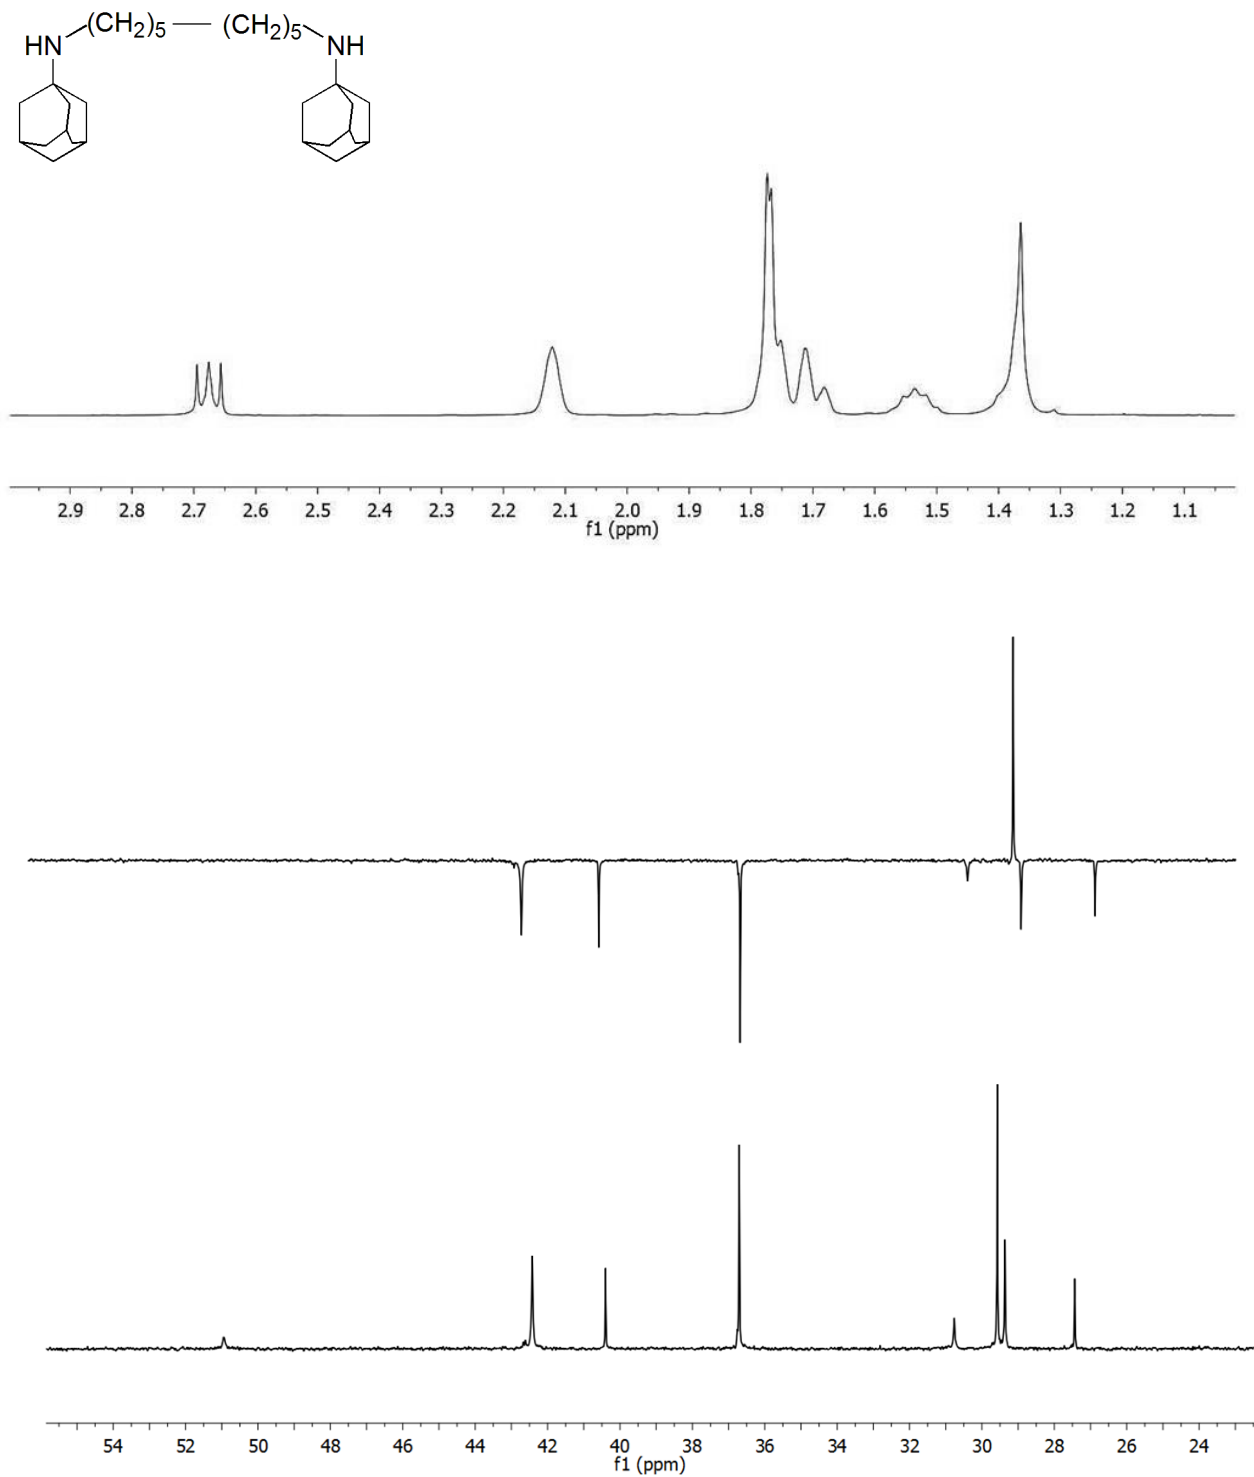

**Figure S6.**  $^1\text{H}$  ( $\text{CD}_3\text{OD}$ , 400 MHz), DEPT-135 and  $^{13}\text{C}$  NMR spectra of  $N,N'$ -Di-adamantan-1-yl-dodecane-1,4-diamine (**2e**)

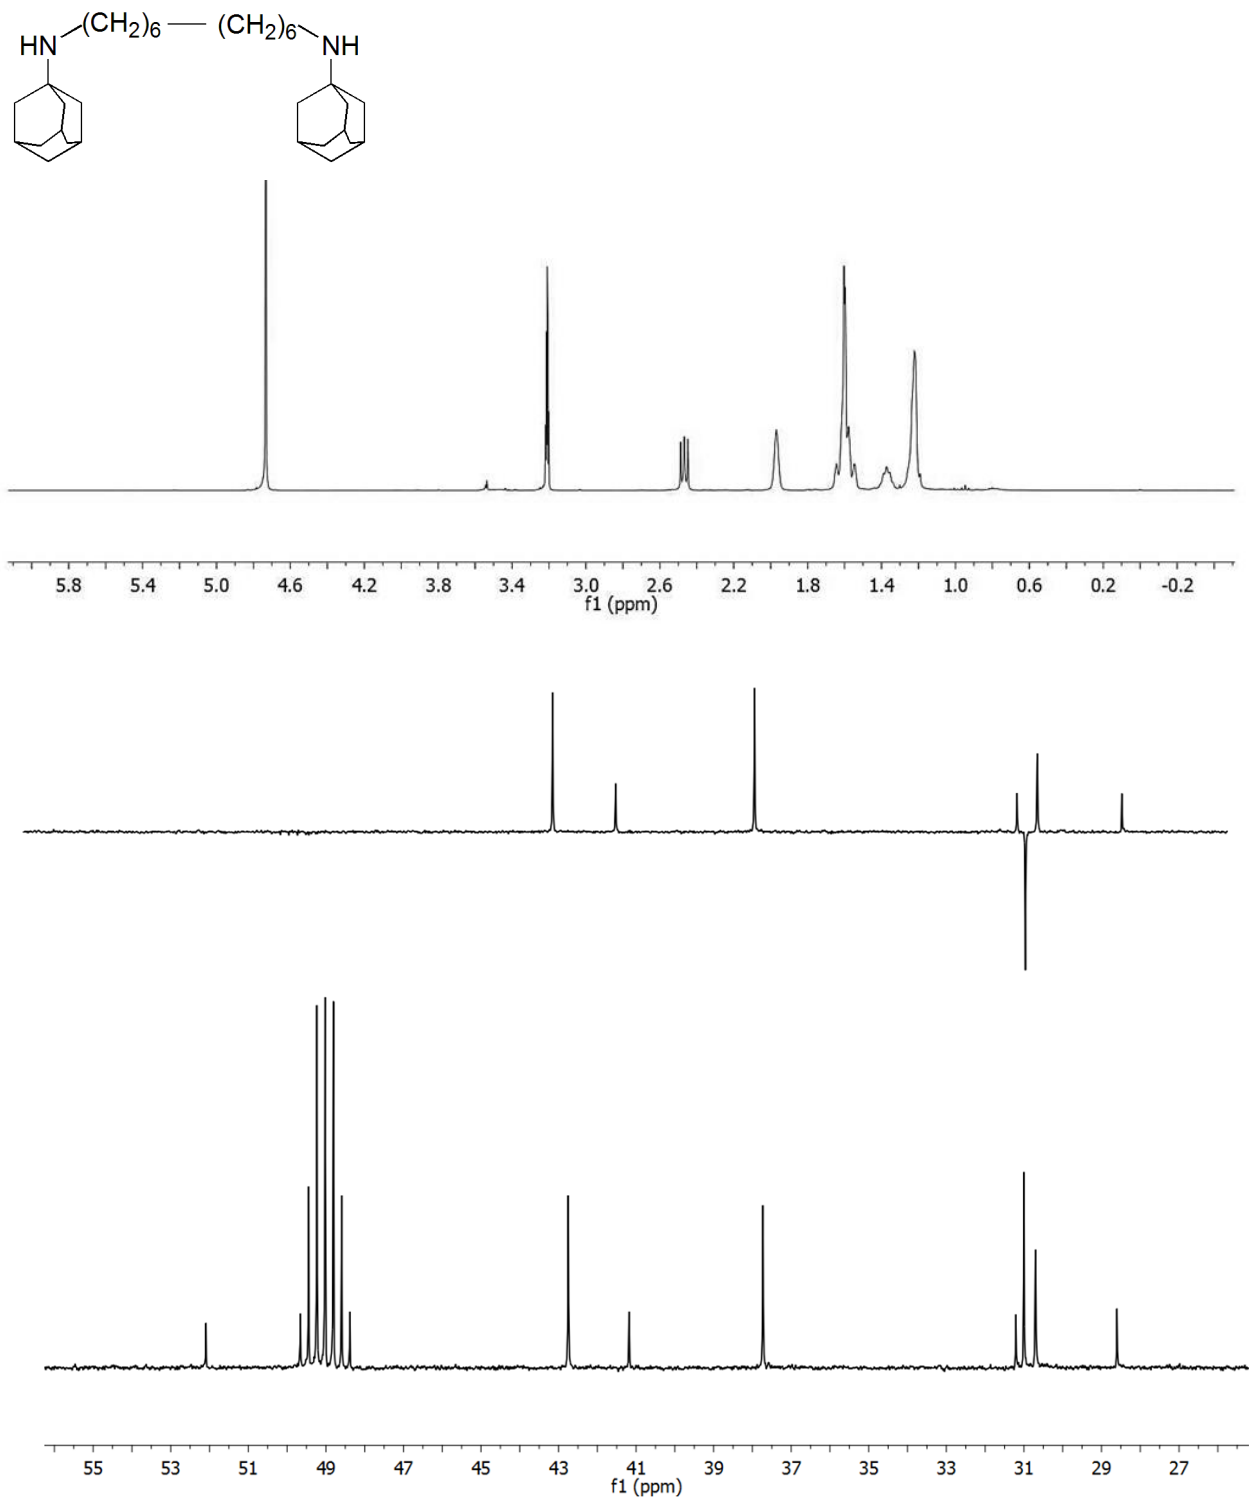



**Figure S7.**  $^1\text{H}$  ( $\text{CDCl}_3$ , 400 MHz), DEPT-135 and  $^{13}\text{C}$  NMR spectra of  $N,N'$ -Bis-(1-adamantan-1-yl-ethyl)-butane-1,4-diamine (**4a**)

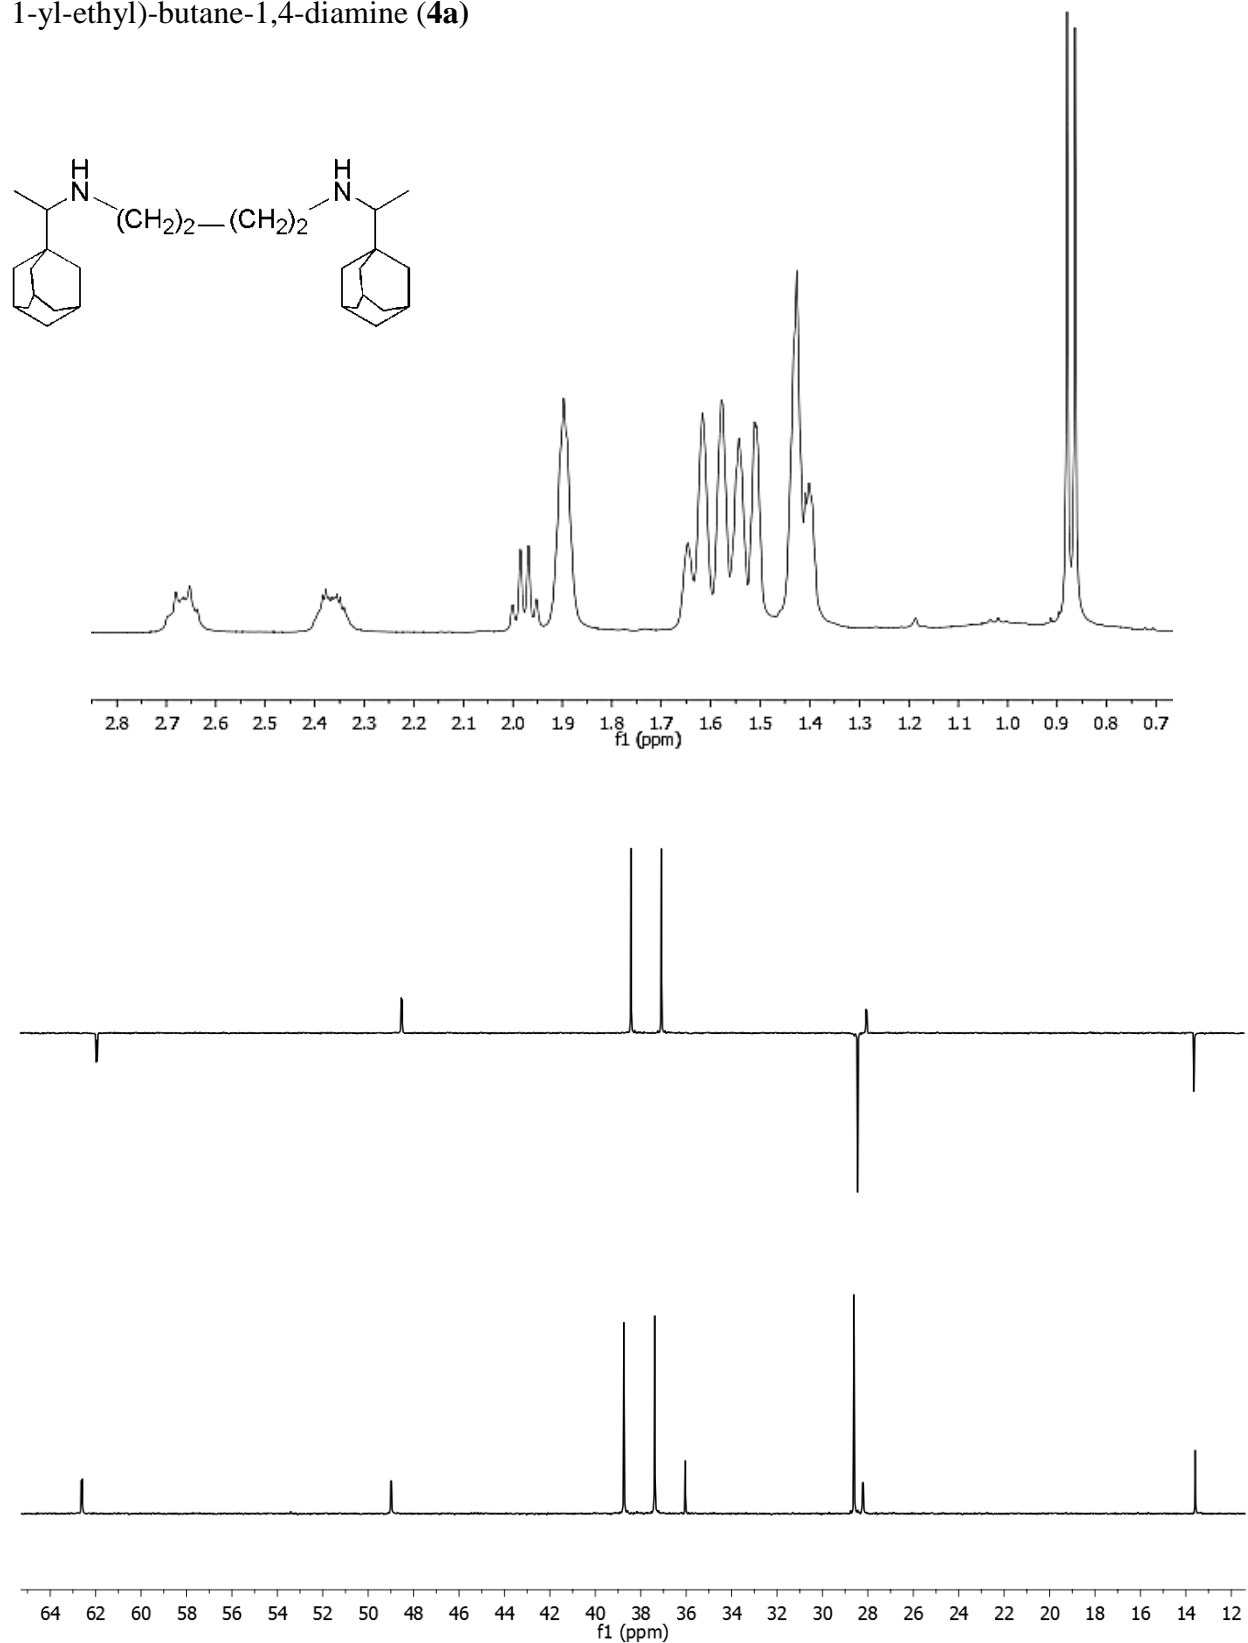

**Figure S8.**  $^1\text{H}$  ( $\text{CDCl}_3$ , 400 MHz), DEPT-135 and  $^{13}\text{C}$  NMR spectra of  $N,N'$ -Bis-(1-adamantan-1-yl-ethyl)-hexane-1,6-diamine (**4b**)

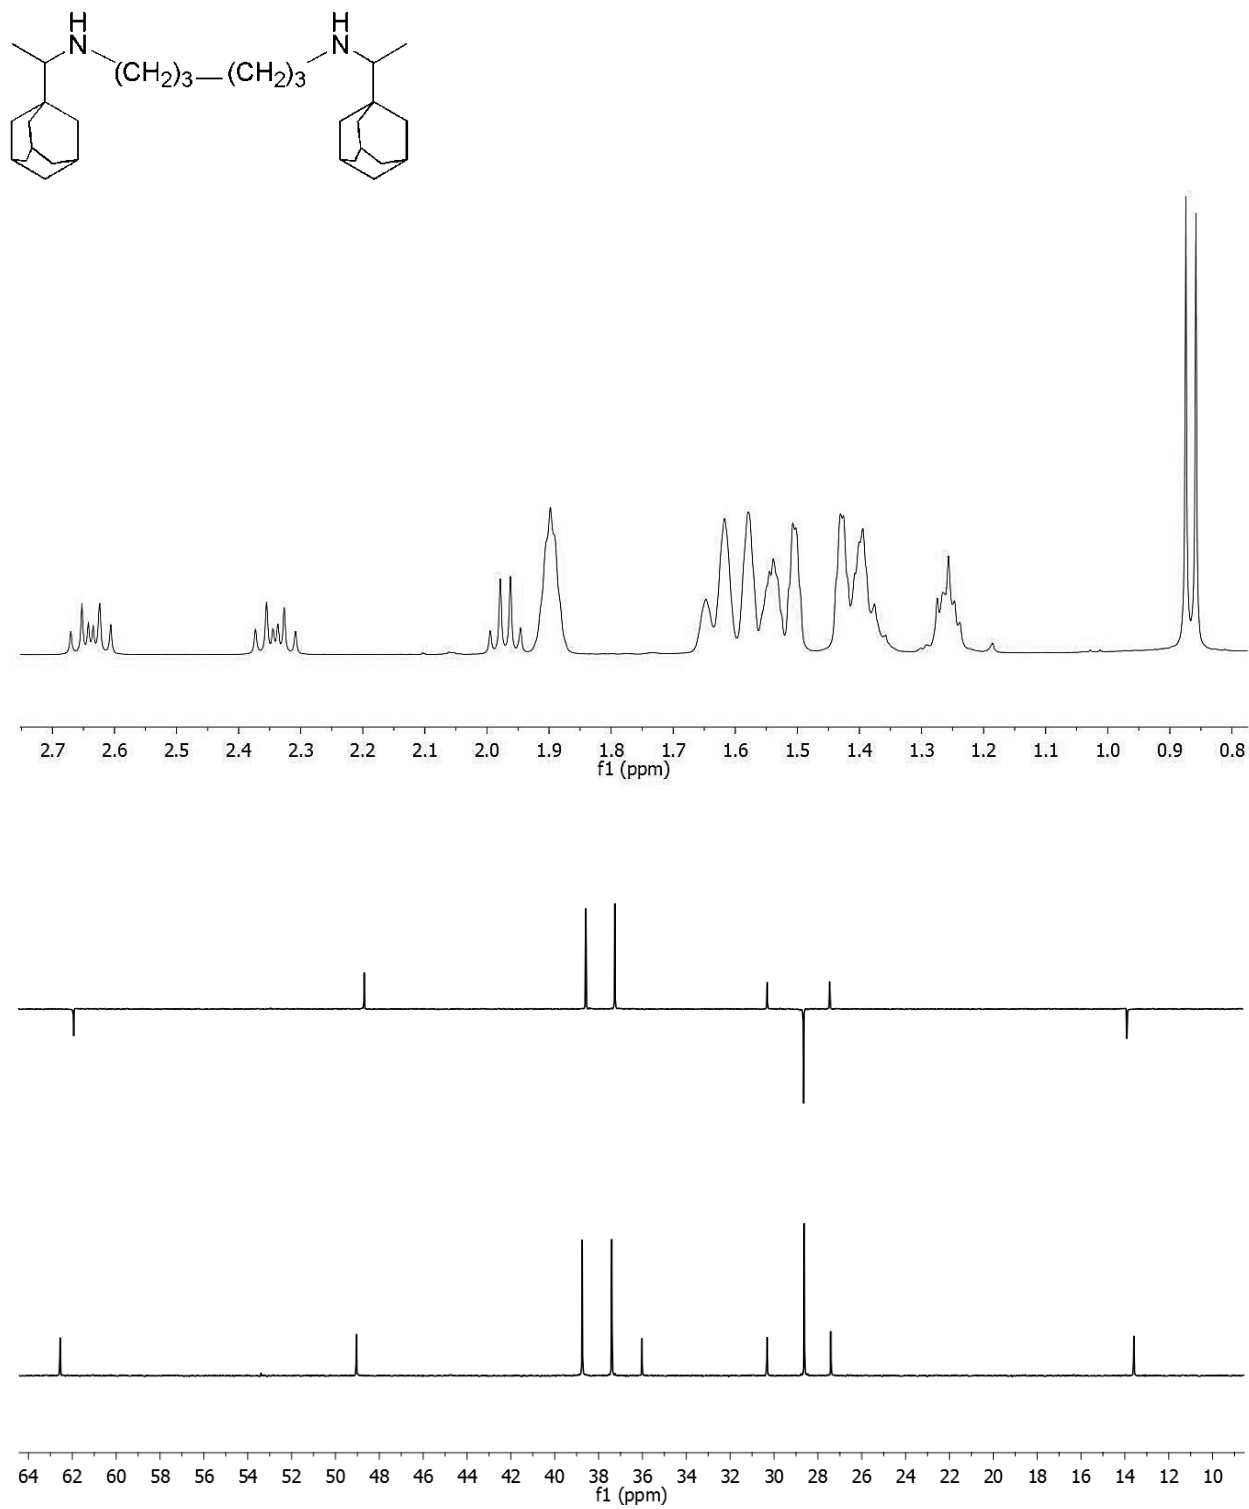

**Figure S9.**  $^1\text{H}$  ( $\text{CDCl}_3$ , 400 MHz), DEPT-135 and  $^{13}\text{C}$  NMR spectra of  $N,N'$ -Bis-(1-adamantan-1-yl-ethyl)-octane-1,8-diamine (**4c**)

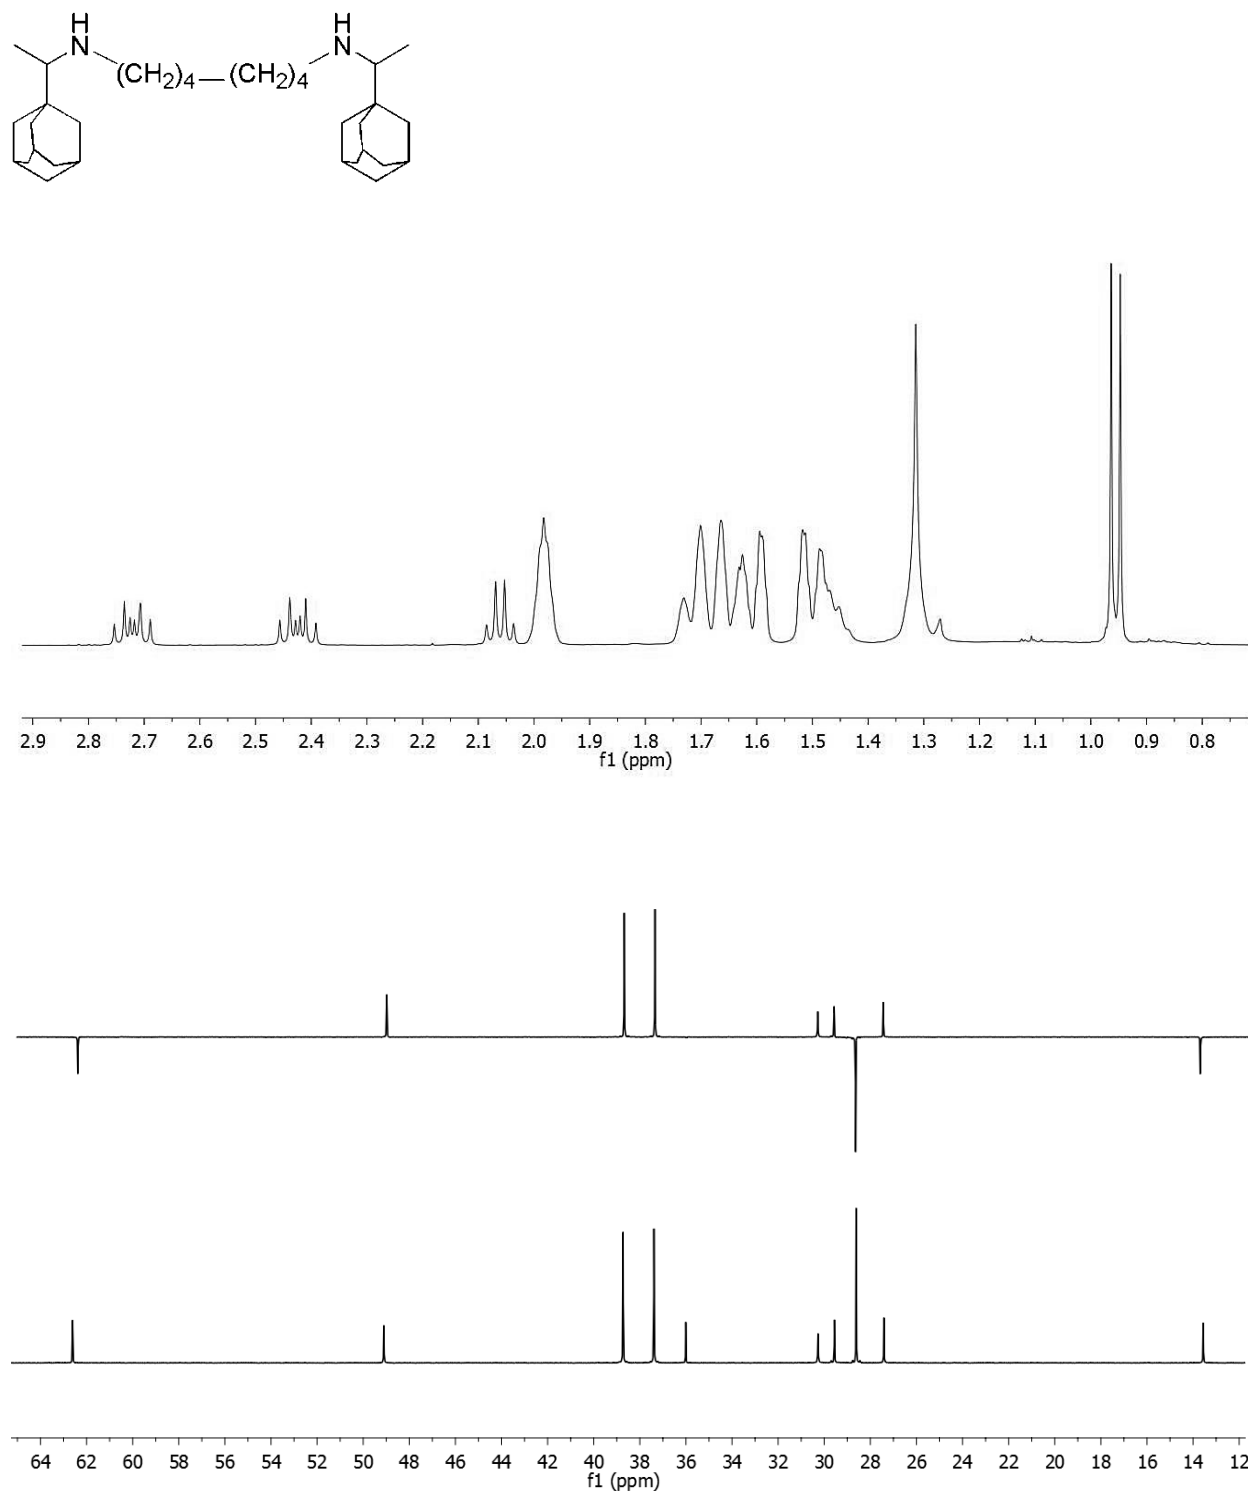

**Figure S10.**  $^1\text{H}$  ( $\text{CDCl}_3$ , 400 MHz), DEPT-135 and  $^{13}\text{C}$  NMR spectra of  $N,N'$ -Bis-(1-adamantan-1-yl-ethyl)-decane-1,10-diamine (**4d**)

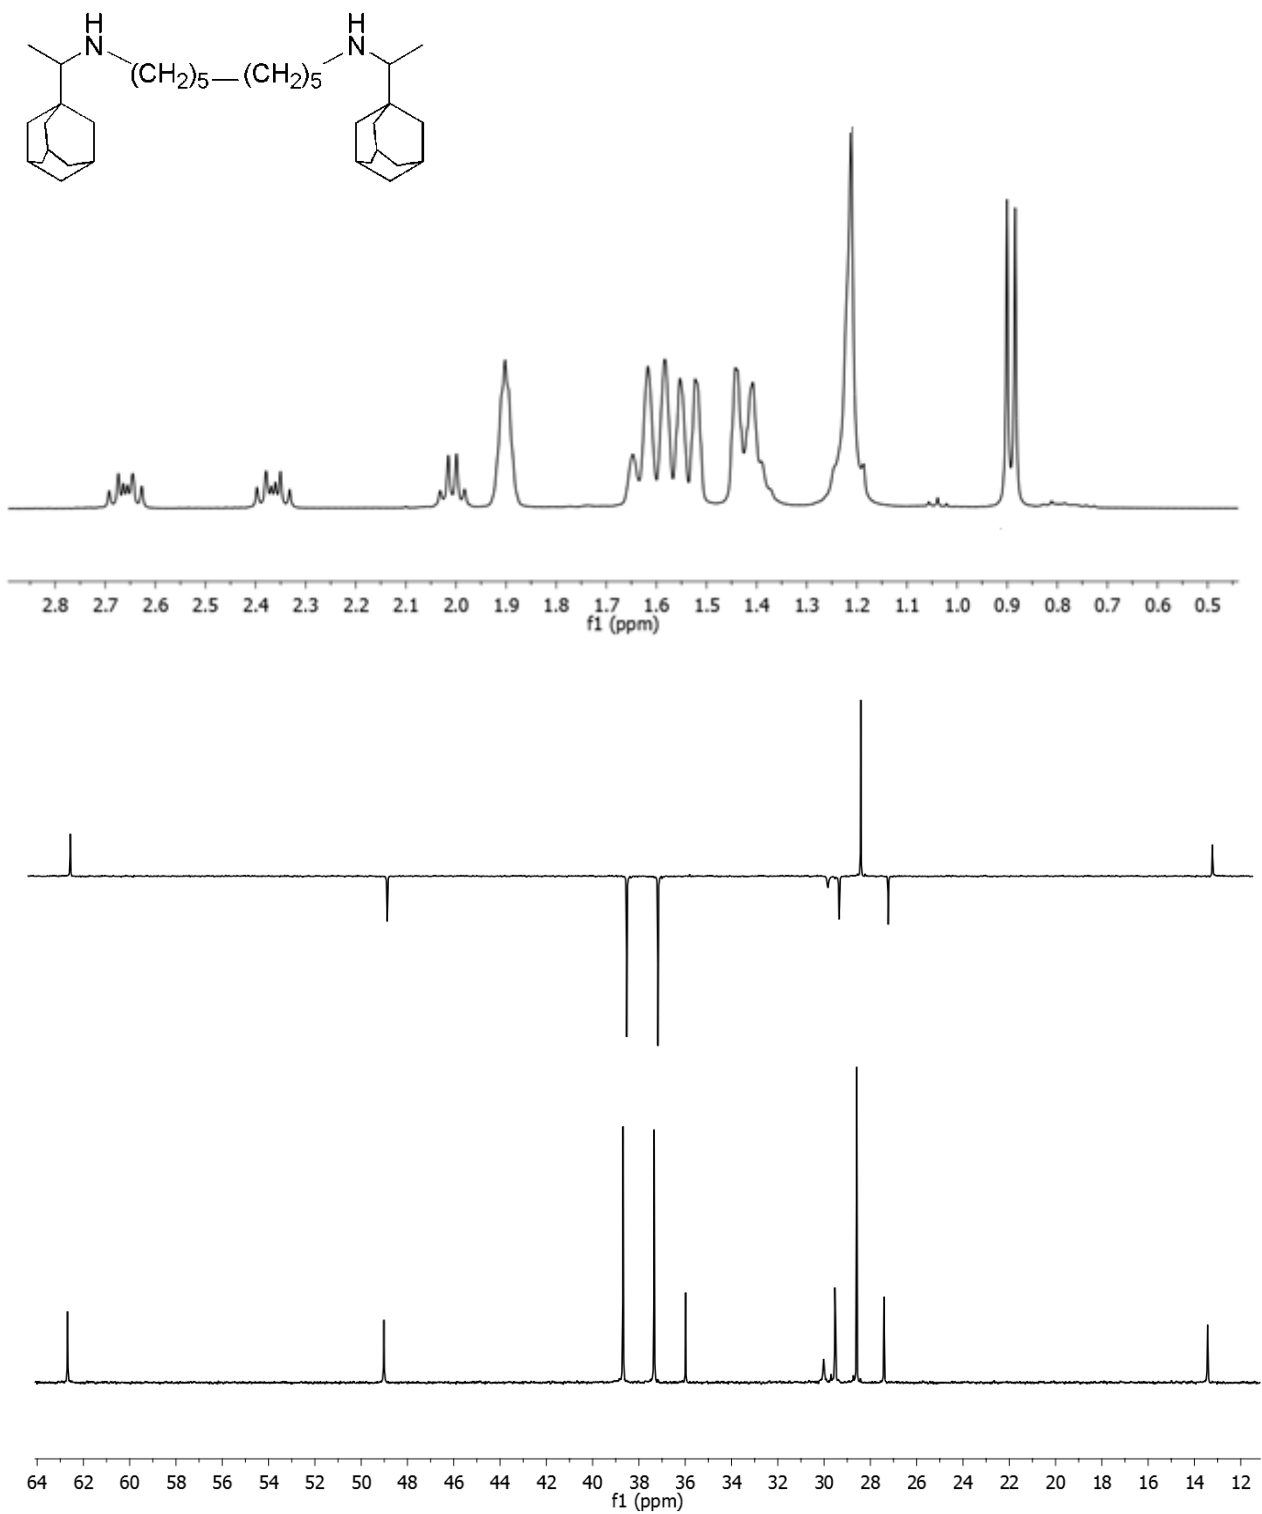

**Figure S11.**  $^1\text{H}$  ( $\text{CDCl}_3$ , 400 MHz), DEPT-135 and  $^{13}\text{C}$  NMR spectra of  $N,N'$ -Bis-(1-adamantan-1-yl-ethyl)-dodecane-1,12-diamine (**4e**)

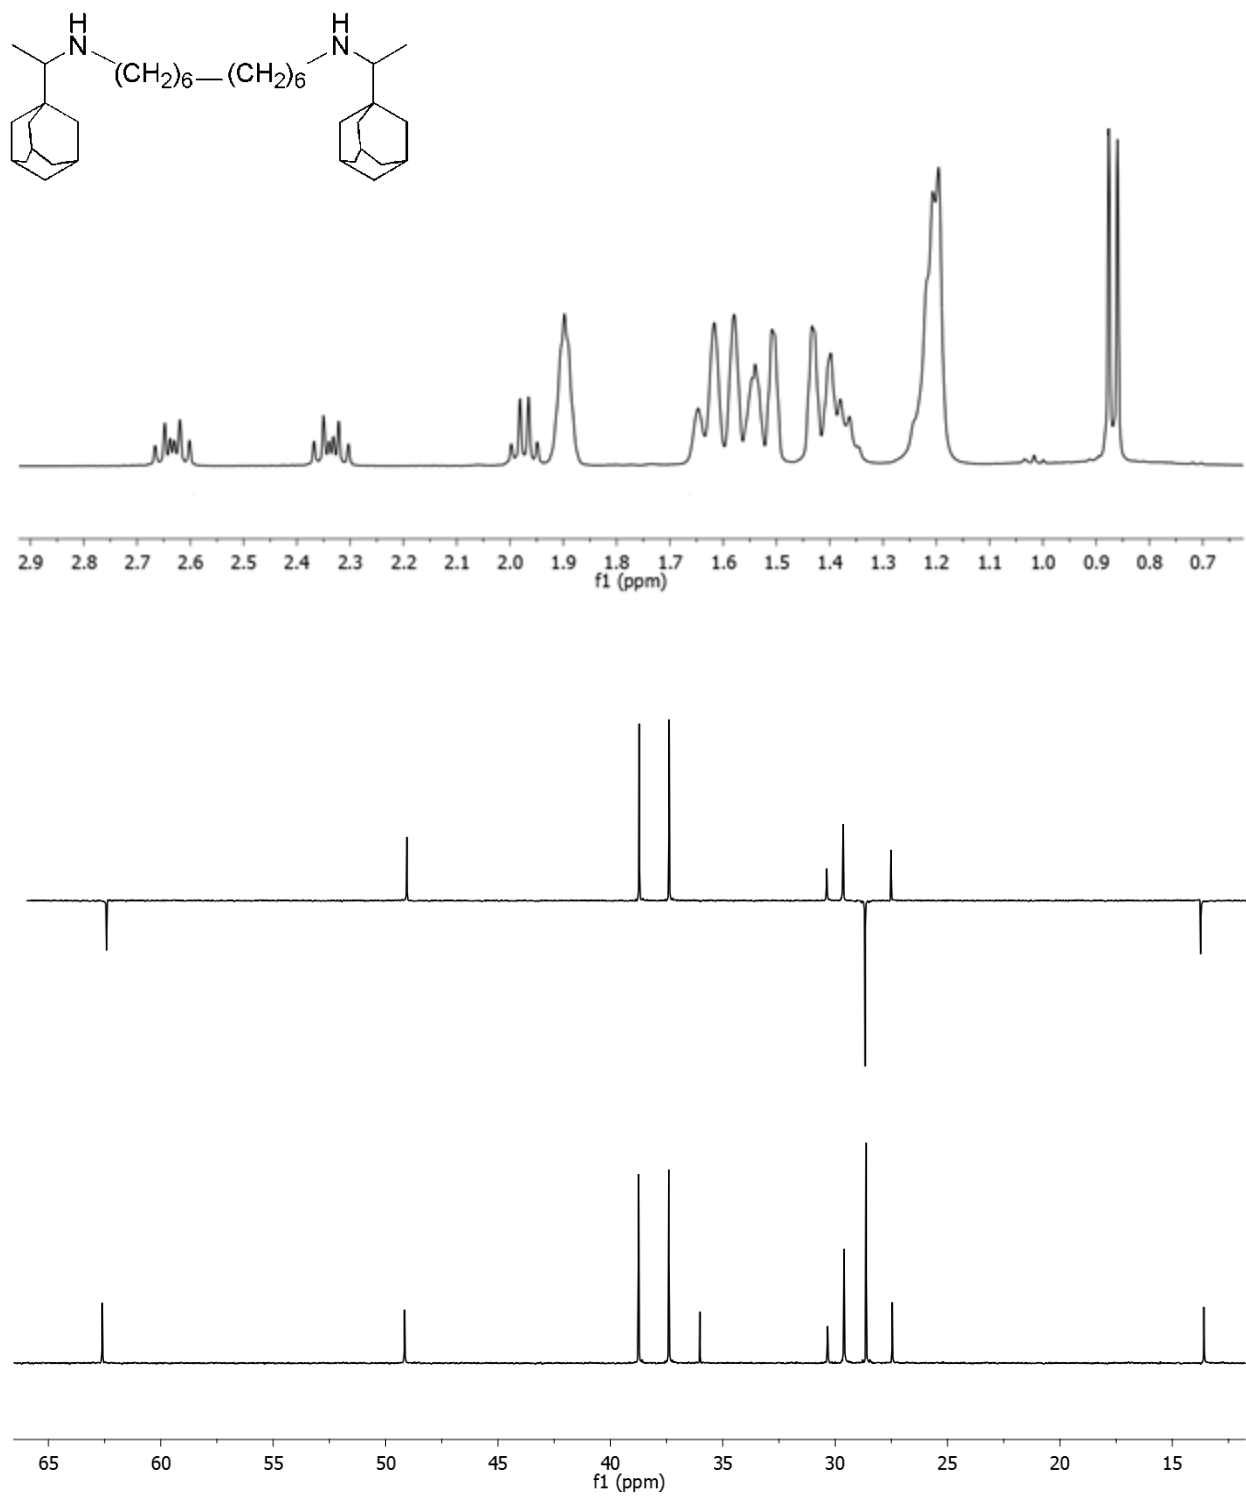

**Figure S12.**  $^1\text{H}$  ( $\text{CDCl}_3$ , 400 MHz), DEPT-135 and  $^{13}\text{C}$  NMR spectra of (1-Adamantan-1-yl-ethyl)-butyl-amine (**5a**)

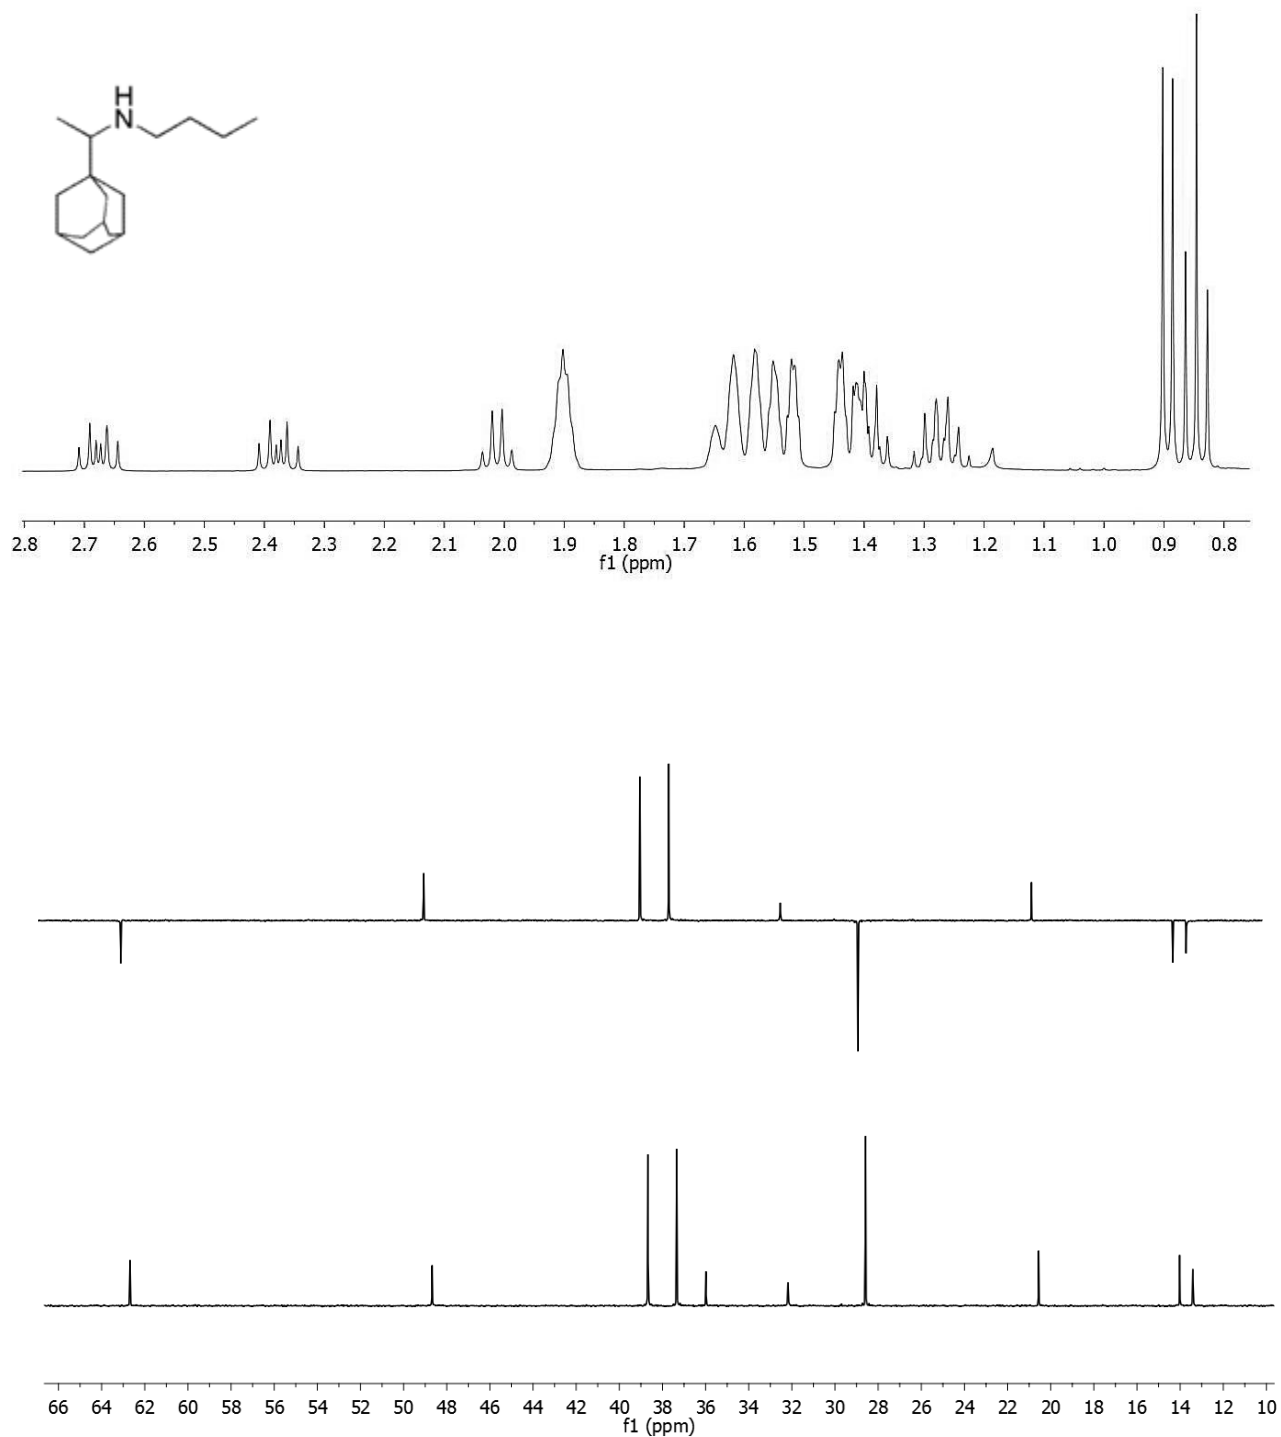

Supplement: Supplementary file 1 [file get_supplementary_file.php]
